# Supplementary material for: Ependymal cilia beating induces an actin network to protect centrioles against shear stress
Source: PubMed Central journal article supplement (PMC5996024; doi:10.1038/s41467-018-04676-w), 2018-06-11
Supplement: 41467_2018_4676_MOESM1_ESM.pdf [file 41467_2018_4676_MOESM1_ESM.pdf]

**Ependymal cilia beating induces an actin network to protect centrioles against shear stress**

Mahuzier et al.

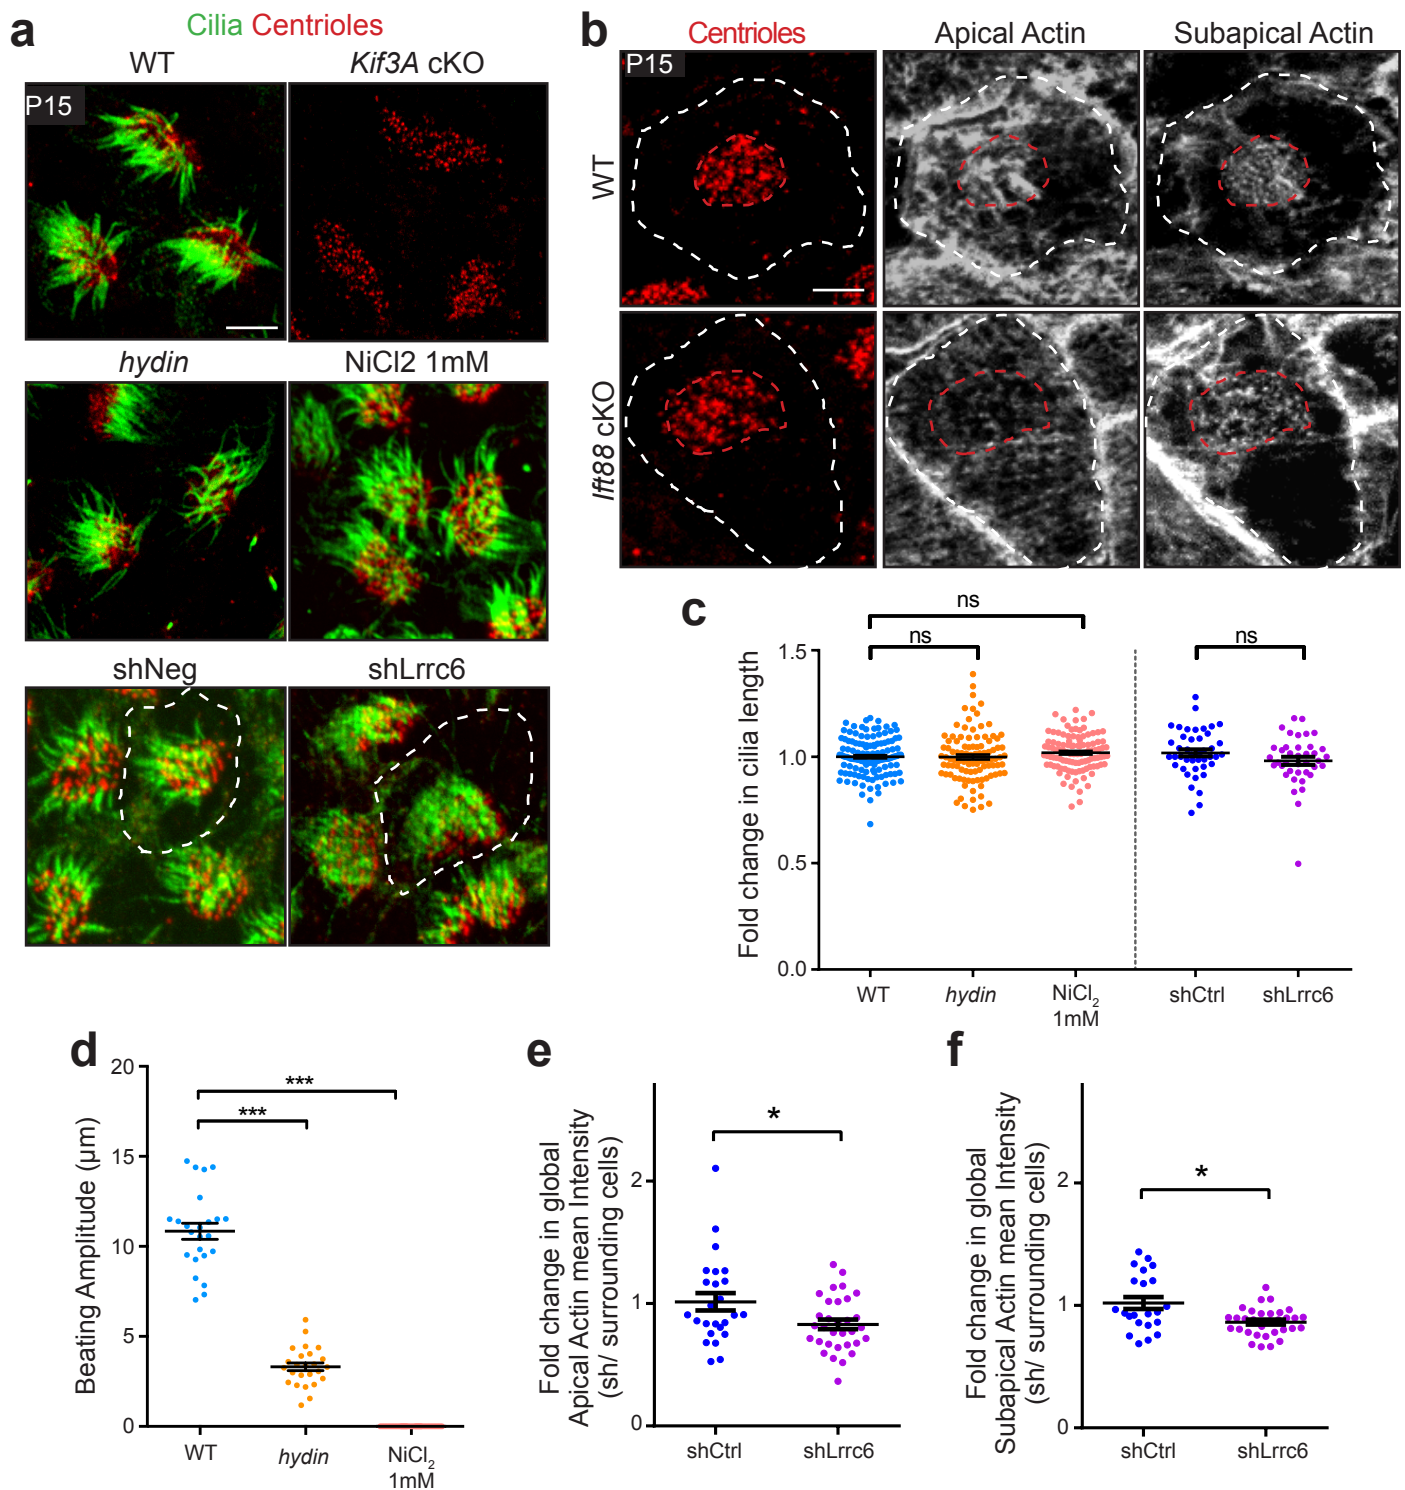

**Supplementary Fig. 1: Cilia and actin in ciliary defective mice.**

**a**, Mature ependymal cells on lateral ventricular walls of P15 mice, mutant for ciliary genes (*Kif3A-cKO* or *hydin*) or WT-untreated, -treated for 40h with 1mM NiCl<sub>2</sub> or -transfected at birth with shCtrl or shLrrc6, in which cilia (GT335, green) and centrioles (FOP, red) were stained. Motile cilia are absent only in *Kif3A-cKO*. **b**, F-actin (phalloidin, gray) and centrioles (FOP, red) in mature ependymal cells (P15) in control (WT) and the ciliary mutant mice *Ifi88-cKO*; cell borders and centriolar patches are outlined with dashed white and red lines, respectively. Apical actin enriched in the centriolar patch is reduced in ciliary mutants. **c**, Fold change in cilia length of ependymal cells of *hydin* ciliary mutants relative to littermate controls or explants treated with NiCl<sub>2</sub> relative to the contralateral wall treated with PBS or ependymal cells transfected with shRNA (shCtrl or shLrrc6) relative to surrounding un-transfected cells; cilia length is not affected by the impairment of cilia motility. n=130 cells for WT, 101 for *hydin* mutants and 106 from NiCl<sub>2</sub>-treated explants; p-values were determined by one-way ANOVA followed by Dunn's multiple comparison test; ns, P>0.05. **d**, Amplitude of cilia beating (μm) measured on motile cilia in brain slices under the indicated conditions. n=25 cells for WT, *hydin* mutants and NiCl<sub>2</sub>-treated explants; p-values were determined with the Mann-Whitney test; \*\*\* P≤0.0001. **(e, f)** Mean phalloidin fluorescence intensities inside the border of transfected cells relative to the mean of the three closest non-transfected control cells at the apical **(e)** and subapical **(f)** levels; apical and subapical actin networks decrease in Lrrc6-depleted cells. At the apical and subapical level, n=22 cells for shCtrl and 32 for shLrrc6 transfected cells. p-values were determined by the Mann-Whitney test; \* P=0.03 and 0.01 for the apical and subapical levels, respectively. Scale bars, 5 μm. Error bar represent the sem between n of three independent experiments in all graphs.

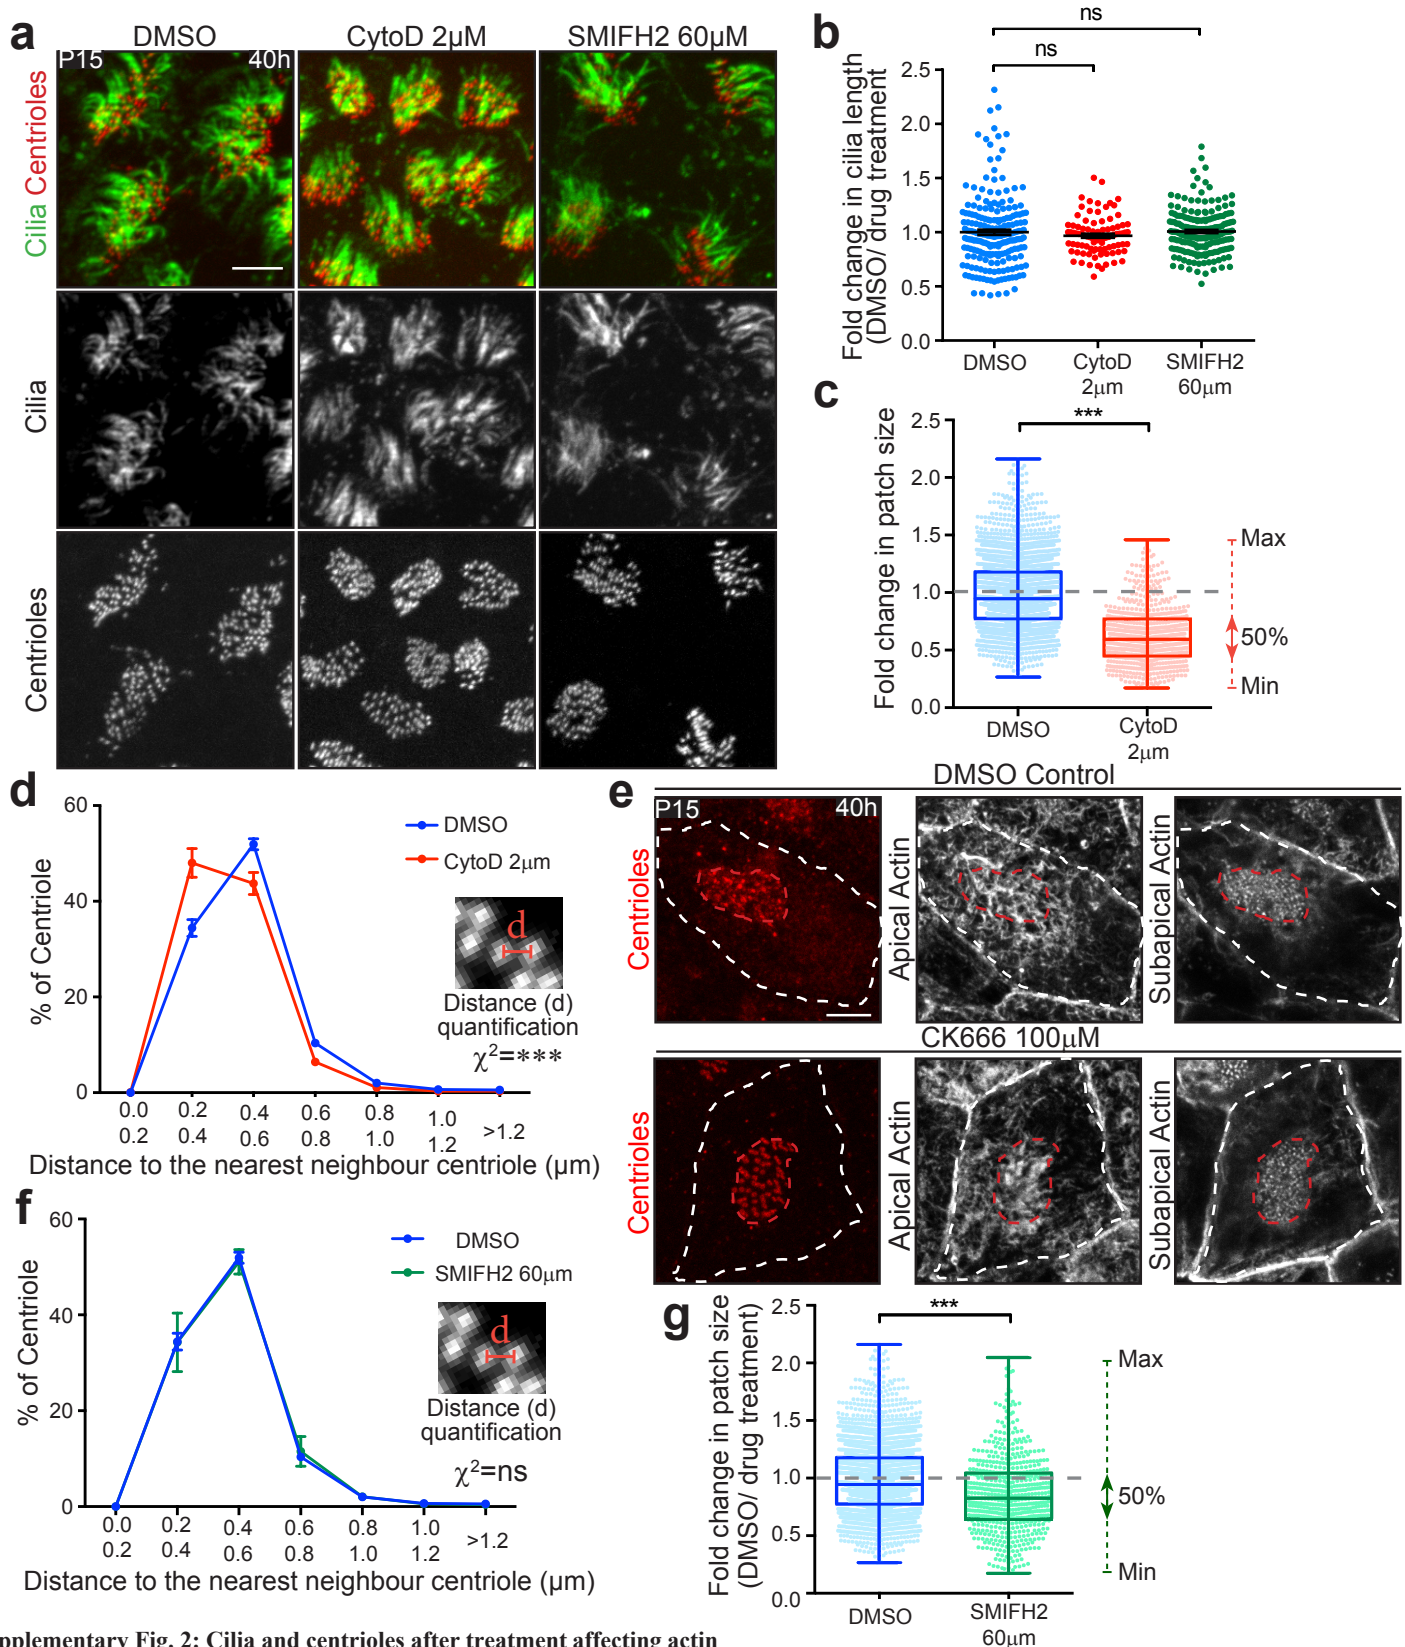

**Supplementary Fig. 2: Cilia and centrioles after treatment affecting actin**

**a**, Cilia (GT335, green) and centrioles (FOP, red) staining on mature (P15) ependymal cell lateral ventricular wall explants after a 40h treatment with DMSO (controls), cytochalasin-D (CytoD 2µM) or the formin inhibitor SMIFH2 (60µM). **b**, Fold change in cilia length in DMSO-, CytoD- or SMIFH2-treated explants, relative to the contralateral wall treated with DMSO. n=206 cells for DMSO-, 194 for SMIFH2- and 91 for CytoD-treated explants; p-values were determined by one-way ANOVA followed by Dunn's multiple comparison test. **c**, Fold change in centriolar patch size in explants of Centrin2-GFP mice treated with DMSO (controls) or cytochalasin-D (2µM) for 40h, relative to contralateral wall explant treated with DMSO; patch size decreases after treatment with cytochalasin-D; p-values were determined with the Mann-Whitney test. n=2411 cells for DMSO- and 707 for CytoD-treated explants. **d**, Quantification of the distance of each centriole from its nearest neighbour in explants from P15 Centrin2-GFP mice treated with DMSO or cytochalasin-D (2µM) for 40h. n=136146 centriolar distance for DMSO- and 37285 for CytoD-treated explants; p-values were determined with the Chi<sup>2</sup> test for trend. **e**, F-actin (phalloidin, gray) and centrioles (FOP, red) in mature ependymal cells from explants treated with DMSO or the Arp2/3 inhibitor CK666 (100µM). Cell borders and centriolar patches are outlined with dashed white and red lines, respectively. No differences in actin organisation were noted. **f**, Quantification of the distance of each centriole from its nearest neighbour in explants from P15 Centrin2-GFP mice treated with DMSO or SMIFH2 for 40h. n>29701 centrioles; p-values were determined with the Chi<sup>2</sup> test for trend. **g**, Fold change in centriolar patch size in explants of Centrin2-GFP mice treated with DMSO (controls) or SMIFH2 for 40h, relative to the contralateral wall explant DMSO-treated; patch size decreases after treatment with SMIFH2; p-values were determined with the Mann-Whitney test. n=2411 cells for DMSO- and 601 for SMIFH2-treated explants. Scale bar, 5µm. Error bar represent the sem from n of three independent experiments in dot plot graphs or between the three independent experiments in the distribution graphs ns, P>0.05. \*\*\* P<0.0001.



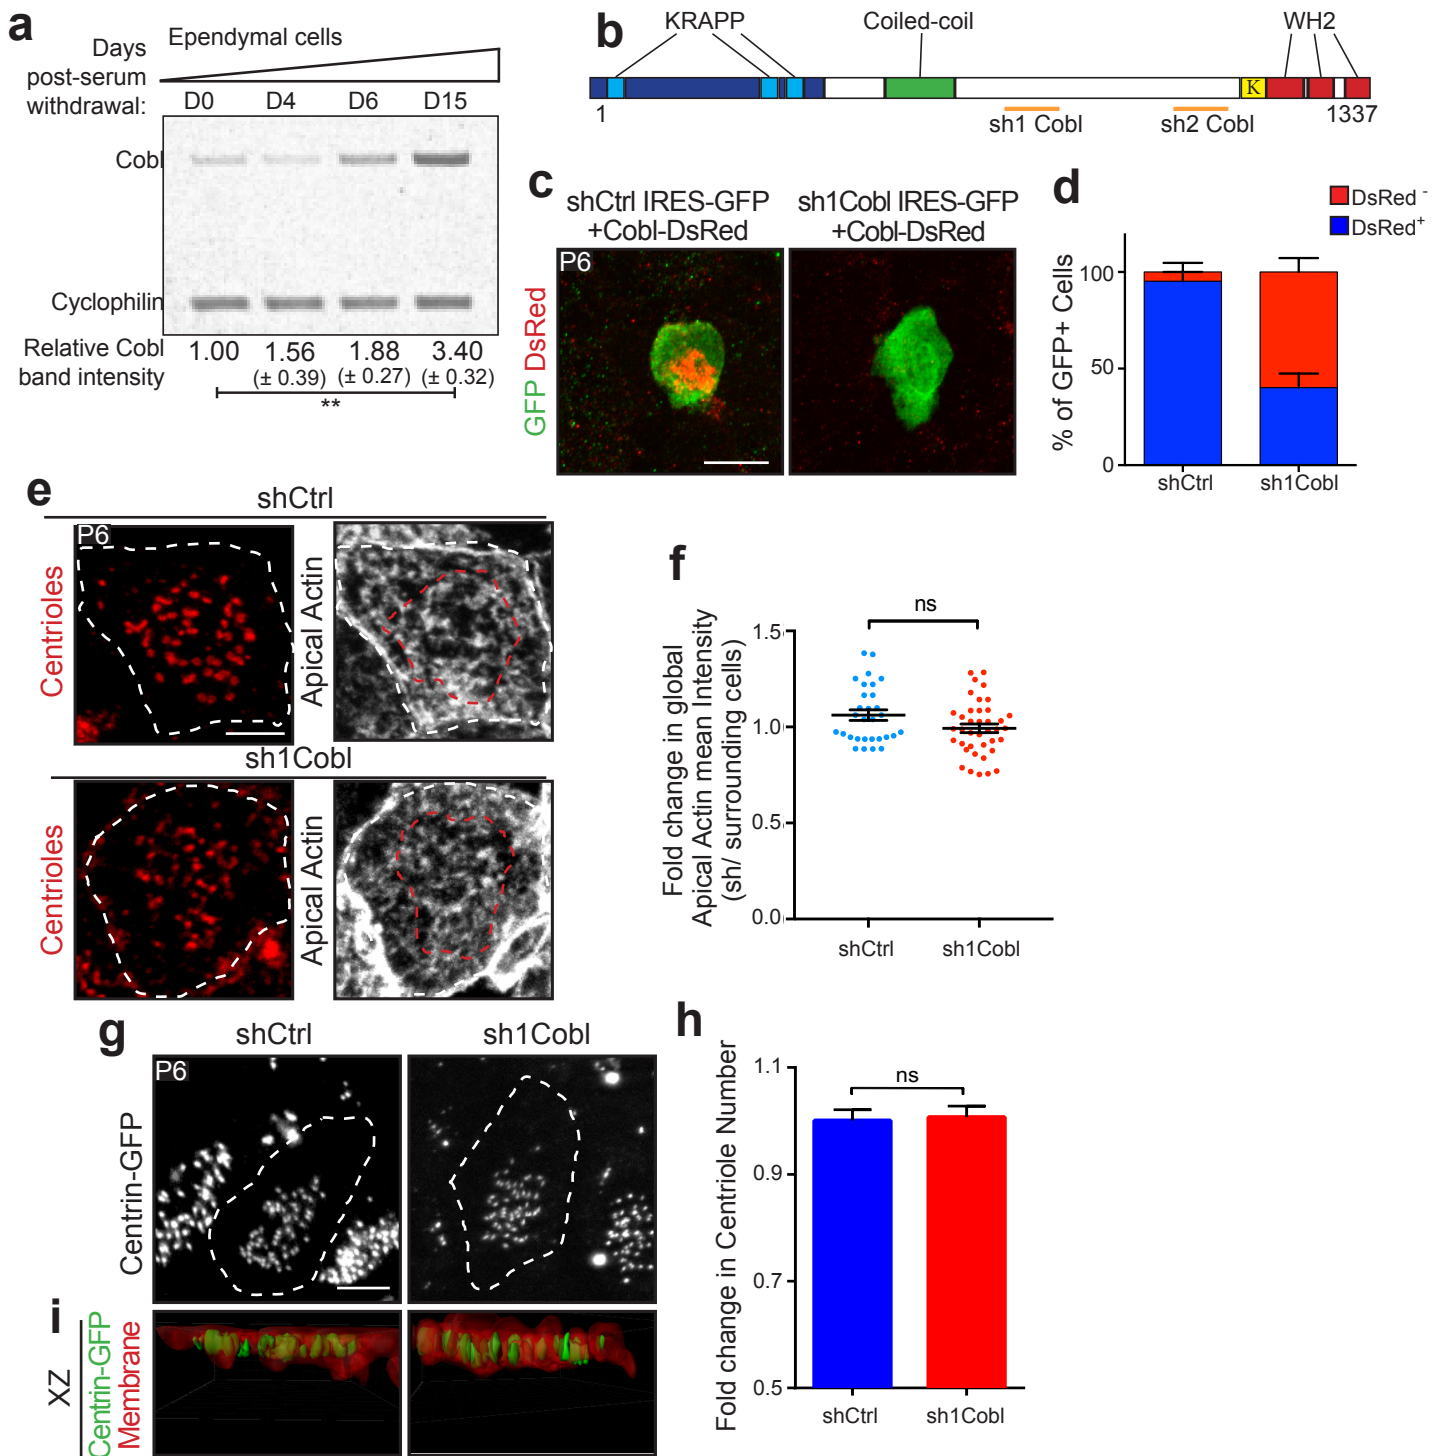

### Supplementary Fig. 3: Cobl-expression and -depletion at early stages of differentiation.

**a**, Representative semi-quantitative RT-PCR on Cobl mRNA extracted from ependymal cells at different stages of differentiation: D0, progenitor cells; D4 and 6, differentiating ependymal cells; D15, mature ependymal cells. Intensities of Cobl- normalised with cyclophilin-DNA bands are represented as the mean $\pm$ sem. p-values were determined with the Mann-Whitney test on three independent experiments; \*\* P=0.0018. **b**, Mouse Cobl domains: 'KRAPP', proline-rich ; WH2, Wiskott-Aldrich syndrome protein-homology2; K, lysine-rich and regions targeted by shRNA (sh1Cobl and sh2Cobl). **(c,d)**, Cobl-depletion in cells co-transfected with shCtrl-IRES-GFP or sh1Cobl-IRES-GFP (GFP, green) and COBL-Ds-Red (dsRed, Red). **c**, Representative images. **d**, Percentage of GFP+ cells co-expressing Cobl-dsRed. n>30 cells. **e**, F-actin (phalloidin, gray) and centrioles (FOP, red) in lateral walls of immature ependymal cells (P6) from mice transfected at birth with shCtrl or sh1Cobl and a reporter (mCherry, white dashed lines); the apical actin network was not disrupted in immature ependymal cells. Note the absence of actin enrichment at the centriolar patches and subapical networks in both control and Cobl-depleted cells at this stage; red dashed lines define the centriolar patches. **f**, Apical actin (phalloidin) mean fluorescence intensities within the cell border of immature ependymal cells relative to that in the surrounding cells. n=30 cells for shCtrl and 39 for sh1Cobl transfected cells. **g**, Immature ependymal cells from the lateral ventricular wall of P6 Centrin2-GFP mice electroporated with shCtrl or sh1Cobl (dashed lines) at birth. **h**, Fold change in centriole number in sh-transfected cells relative to surrounding un-transfected cells; the number of centrioles did not decrease in immature Cobl-depleted ependymal cells. n=72 cells for shCtrl and sh1Cobl transfected cells. **i**, 3D-modelling of an XZ projection of centrioles (Green) embedded in the plasma membrane (mCherry reporter, red) in immature (P6) ependymal cells after electroporation with shCtrl or sh1Cobl at birth; the migration and docking of centrioles in Cobl-depleted cells is normal. Scale bars, 5  $\mu$ m. In all graphs, error bar represent the sem between n of three independent experiments. p-values were determined with the Mann-Whitney test; ns, P>0.05.

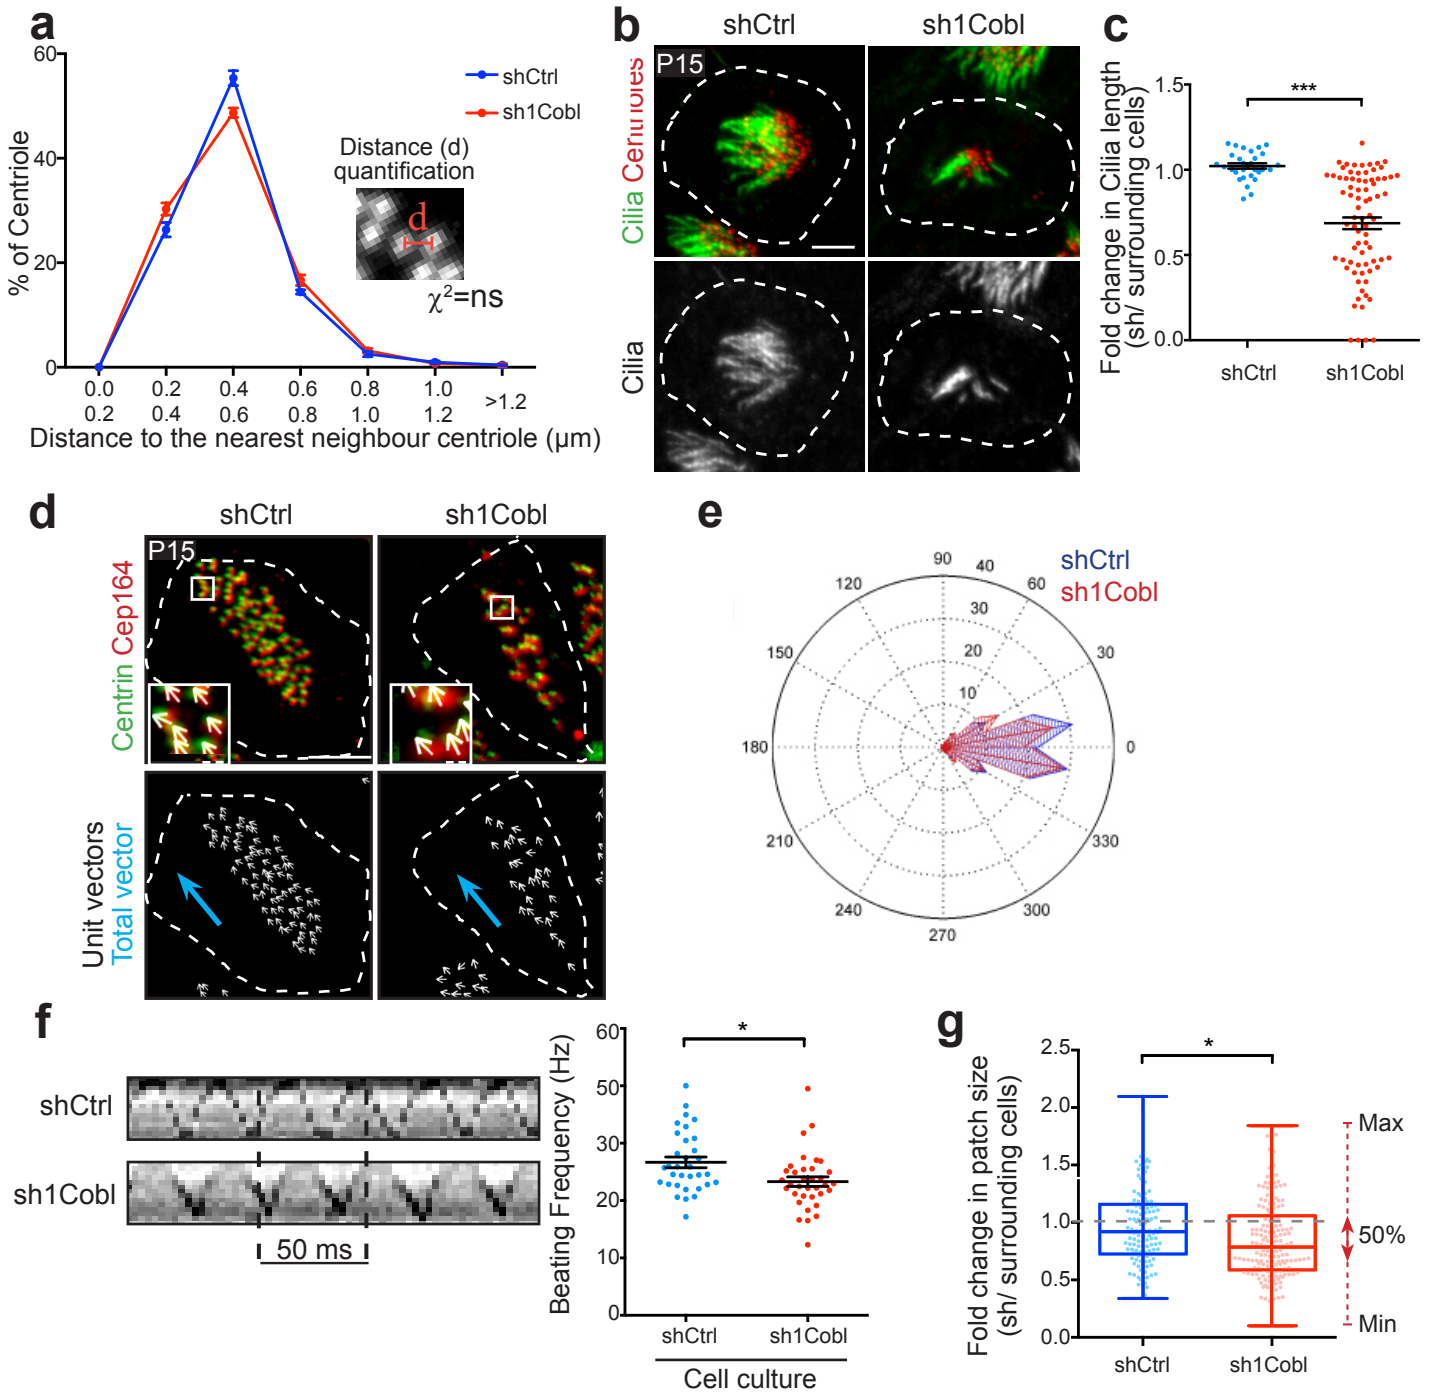

**Supplementary Fig. 4: Cobl depletion at late stage of ependymal differentiation.**

(a-e), Lateral ventricular walls of wild-type or Centrin2-GFP transgenic mice electroporated at birth with shCtrl or sh1Cobl and the mCherry-reporter construct (dashed lines). **a**, Distance between nearest neighbour centrioles in control (shCtrl) or Cobl-depleted (sh1Cobl) ependymal cells.  $n=4111$  distances for shCtrl and 3526 for sh1Cobl cells. p-values were determined with the  $\chi^2$  test for trend; ns,  $P>0.05$ . **b**, Mature Cen2-GFP<sup>+</sup> (Centriole, Red) ependymal cells stained for cilia (GT335, green), showing shorter cilia in Cobl-depleted cells compared to control. **c**, Fold change in cilia length in control (shCtrl) and Cobl-depleted ependymal cells (sh1Cobl) relative to surrounding un-transfected cells.  $n=30$  cells for shCtrl and 77 for sh1Cobl cells. p-values were determined with the Mann-Whitney test; \*\*\*  $P\leq 0.0001$ . **d**, Vectors (white arrows) traced automatically between centrin2-GFP- (green) and Cep164-stained centrioles (red) showing centriole orientation in control (shCtrl) or Cobl-depleted (sh1Cobl) cells (dashed lines). The global beating direction (blue arrows) of each cell is the mean of the individual vectors. **e**, Angles between each individual vector and the general beating vector showing that the orientation of centrioles was globally equivalent, although slightly more disperse, in Cobl-depleted cells compared to controls; p-values were determined with the Kolmogorov-Smirnov test ( $P=0.0006$ ) and the Waston-U2 circular permutation ( $P=0.0008$ ; 50,000 iterations) on  $n>65$  cells from three independent experiments. **f**, Given the low efficiency of *in vivo* electroporation Cobl was depleted *in vitro*. Representative kymographs (200ms) of motile cilia in differentiated ependymal cell in culture (14 days after onset of differentiation); the ciliary beating frequency (Hz) in Cobl-depleted cells (sh1Cobl) was lower than in shCtrl.  $n=33$  cells for shCtrl and 35 for sh1Cobl cells; p-values were determined by the Mann-Whitney test; \*\*  $P=0.0093$ . **g**, Fold change in centriolar patch size relative to neighbouring cells of P15 Centrin2-GFP transgenic mice electroporated at birth with shCtrl or sh1Cobl and the mCherry reporter construct, showing smaller patches in sh1Cobl compared to shCtrl cells.  $n=128$  cells for shCtrl and 168 for sh1Cobl cells. p-values were determined with the Mann-Whitney test; \*\*  $P=0.0018$ . Scale bar, 5  $\mu\text{m}$ . Error bar represent the sem between  $n$  of three independent experiments in dot plot graphs or between three independent experiments in the distribution graphs.

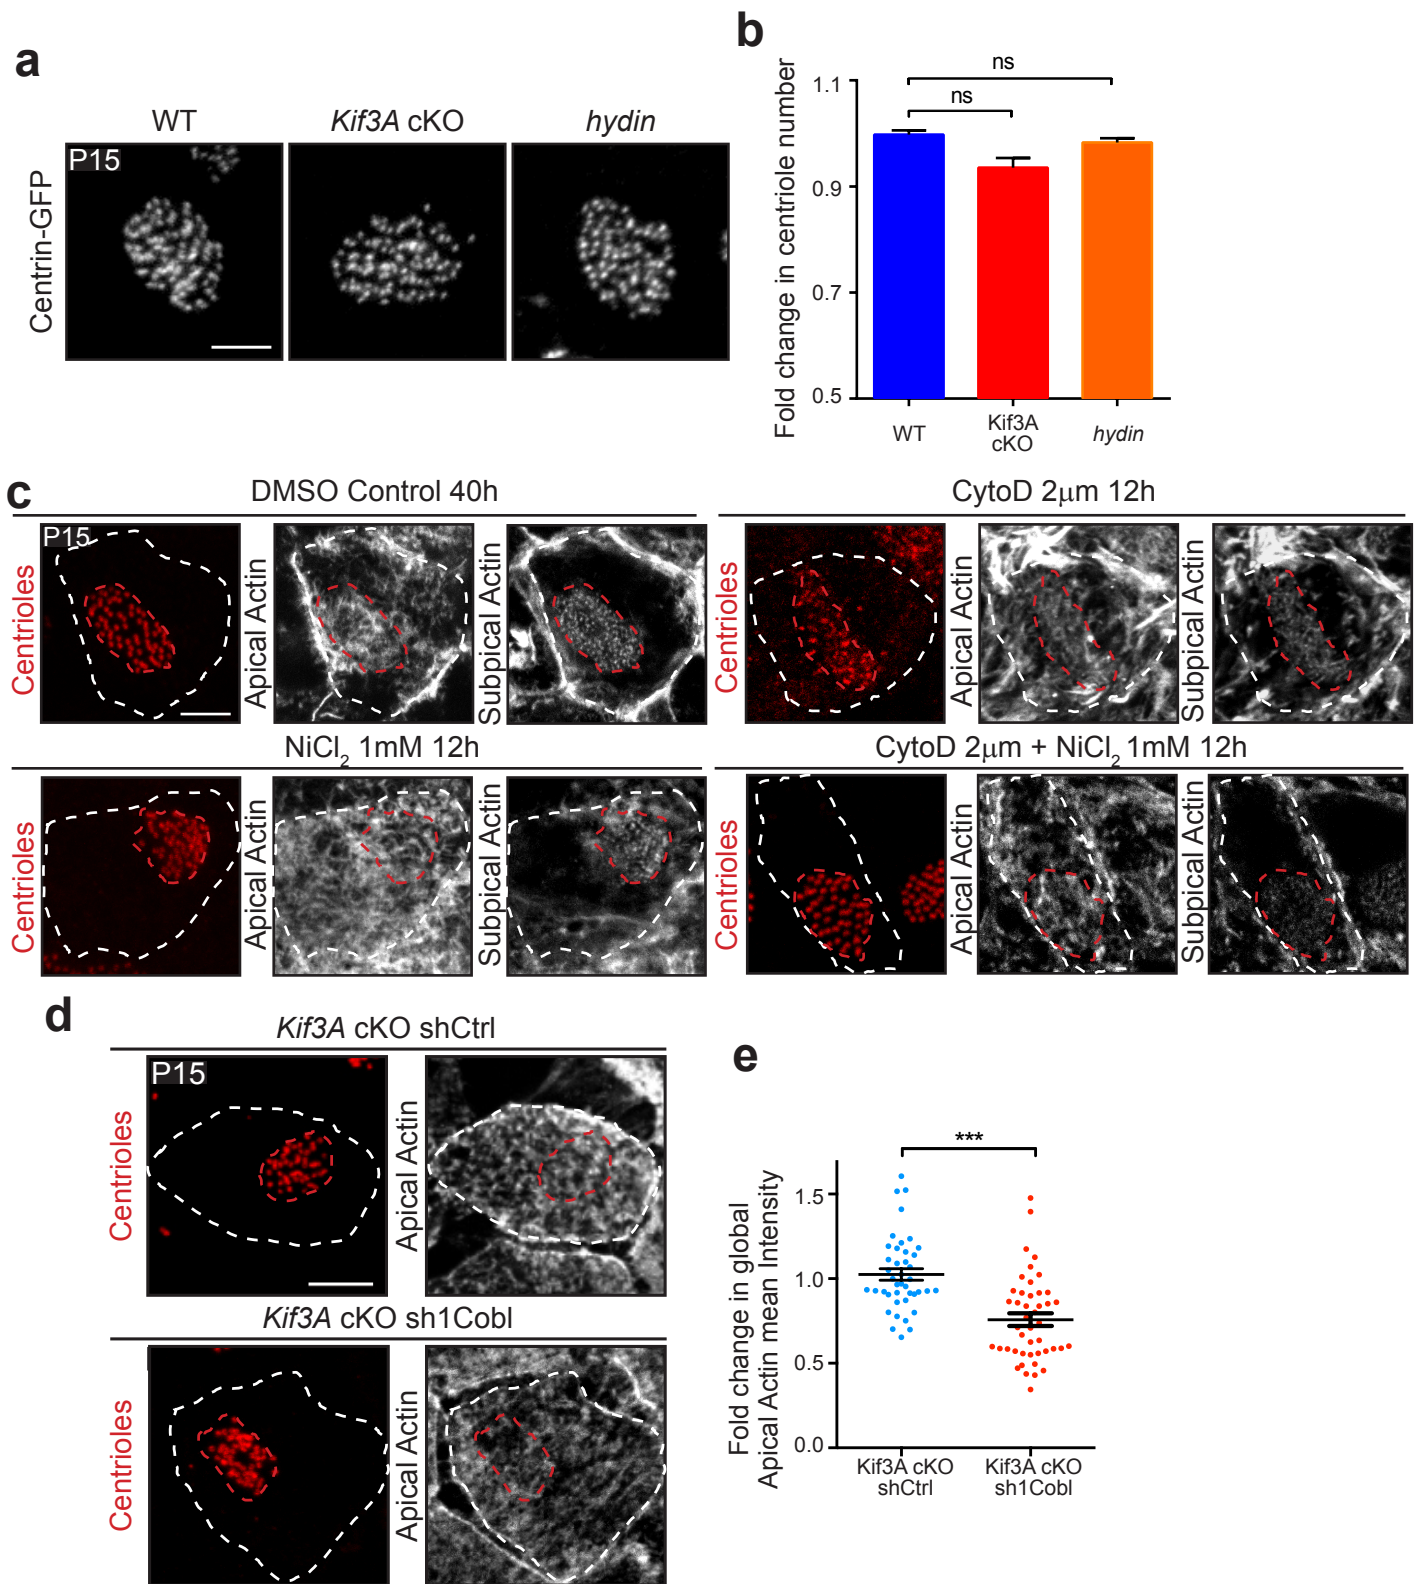

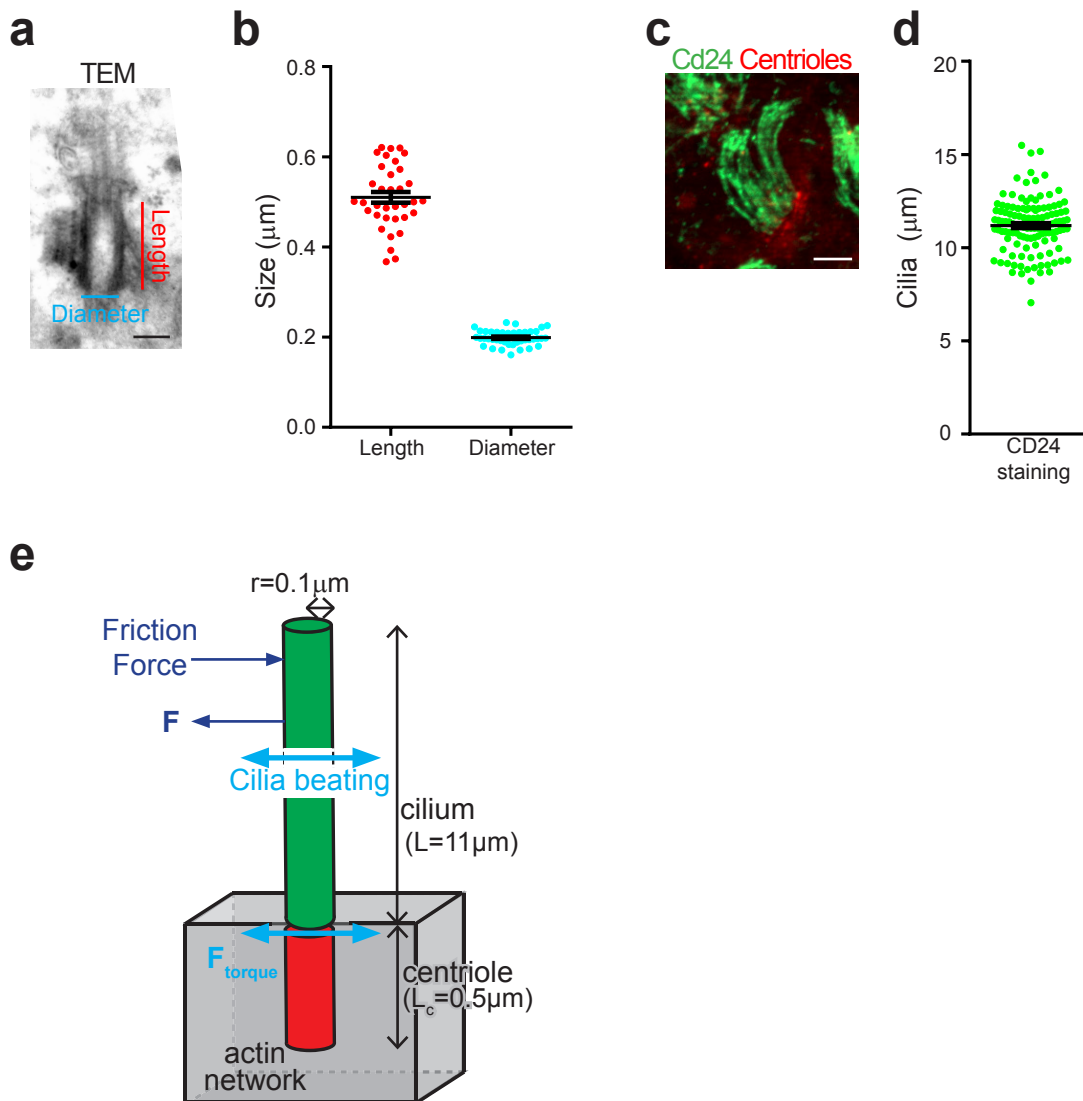

**Supplementary Fig. 6: Geometrical characteristics of centrioles and motile cilia of ependymal cells**

**a**, Transmission electron microscopy of centrioles of multiciliated ependymal cells at P21. Scale bar 0.2 μm. **b**, Centriole diameter and length. Error bars represent the sem of  $n=43$  centrioles for the diameter and 35 centrioles for the length. **c**, Ependymal cells at P15 stained for the membrane marker CD24 (cilia, green) and centrioles (20H5, Red). **d**, Cilia length evaluated on ependymal cells stained with CD24. Error bar represent the sem of  $n=122$ . **e**, Model of a motile cilium with its base embedded in an actin network: radius,  $r=99\text{nm}\pm 2$  (mean±sem) calculated on electron micrographs; cilia length,  $L=11.1\mu\text{m}\pm 0.1$  (mean±sem) measured using the ependymal cell surface marker CD24; centriole length,  $L_c=510\text{nm}\pm 2$  (mean±sem) calculated on electron micrographs. The hydrodynamic friction force exerted by the fluid flow and its resultant ( $F$ ) are shown as dark blue arrows, while the additional torque exerted by cilia beating and its resultant ( $F_{\text{torque}}$ ) are shown as light blue arrows;
